# Supplementary material
Source: PubMed Central journal article supplement (PMC7932225)
Supplement: JRN867744_Supplemental_Material3.pdf [file JRN867744_Supplemental_Material3.pdf]

## **Developing a measure to capture patient and relative perceptions of changes in patient wellness while in hospital**

### **Possible question options**

1. How in general would you rate your health/condition/wellness?
2. How are you feeling?
3. How well are you feeling?
4. How worried are you about your health/condition/wellness?
5. How concerned are you about your health/condition/wellness?

### **Potential timeframe for questions**

1. How in general would you rate your health/condition/wellness compared to the last time you rated your health?
2. How are you feeling compared to the last time you answered this question?
3. How well are you feeling since we last asked you?
4. How worried are you about your health/condition/wellness since you were last asked?

### **Possible response options**

1. Very poor - Poor - Fair - Good - Very good
2. Much worse - Worse - No change - Better - Much better
